# Supplementary material
Source: publisher figshare collection journal article supplement (https://sage.figshare.com/ndownloader/files/14144891)
Supplement: Supplementary file 1 [file 14144891]

### Supplemental Materials

Table S1.

Effectiveness of Emotion Regulations in Downregulating Negative Emotions in Psychosis vs no Psychosis.

| r value                       |          |            |          |        |               |                        |
|-------------------------------|----------|------------|----------|--------|---------------|------------------------|
|                               | Distract | Reappraise | Suppress | Soothe | Interpersonal | Situation Modification |
| Psychosis                     | -0.14    | 0.10       | -0.29    | -0.23  | 0.28          | 0.07                   |
| No Psychosis                  | -0.42    | -0.26      | -0.17    | -0.03  | -0.05         | -0.10                  |
| F –values for Group contrasts |          |            |          |        |               |                        |
|                               | Distract | Reappraise | Suppress | Soothe | Interpersonal | Situation Modification |
| Time lagged Correlation       | 2.67     | 2.48       | 0.24     | 0.73   | 2.33          | 0.4                    |

Note. Time lagged Correlation = The association between emotion regulation strategy at time t with the change of negative emotion from time t to t+1.

Table S2.

## Effectiveness of Emotion Regulations in Downregulating Negative Emotions in Psychosis

| F Values for Within Group Contrast |          |            |          |        |               |                        |
|------------------------------------|----------|------------|----------|--------|---------------|------------------------|
|                                    | Distract | Reappraise | Suppress | Soothe | Interpersonal | Situation Modification |
| Distract                           |          | 1.49       | 0.75     | 0.20   | 4.99          | 1.33                   |
| Reappraise                         |          |            | 4.57     | 2.66   | 0.90          | 0.03                   |
| Suppress                           |          |            |          | 0.11   | 10.35**       | 4.67*                  |
| Soothe                             |          |            |          |        | 7.03*         | 2.53                   |
| Interpersonal                      |          |            |          |        |               | 1.40                   |
| Situation Modification             |          |            |          |        |               |                        |

Note. Time lagged Correlation = The association between emotion regulation strategy at time t with the change of negative emotion from time t to t+1. Suppress was more effective than Interpersonal and Situation Modification in downregulating negative emotions, and soothe was more effective than Interpersonal. Note: \* p<0.05, \*\*p<0.01.

Table S3.

Effectiveness of Emotion Regulations in Downregulating Negative Emotions in No Psychosis

| <b>F Values for Within Group Contrast</b> |          |            |          |        |               |                           |
|-------------------------------------------|----------|------------|----------|--------|---------------|---------------------------|
|                                           | Distract | Reappraise | Suppress | Soothe | Interpersonal | Situation<br>Modification |
| <b>Distract</b>                           |          | 0.65       | 1.17     | 3.49   | 3.11          | 1.47                      |
| <b>Reappraise</b>                         |          |            | 0.10     | 0.77   | 0.66          | 0.24                      |
| <b>Suppress</b>                           |          |            |          | 0.25   | 0.20          | 0.04                      |
| <b>Soothe</b>                             |          |            |          |        | 0.01          | 0.05                      |
| <b>Interpersonal</b>                      |          |            |          |        |               | 0.03                      |
| <b>Situation Modification</b>             |          |            |          |        |               |                           |

Note. Time lagged Correlation = The association between emotion regulation strategy at time t with the change of negative emotion from time t to t+1. Distract varied from Soothe and Interpersonal in downregulating negative emotions at a trend level. \*  $p < 0.10$ .

Table S4.

Table. Negative Emotion Variability Across Psychosis Contexts

|                         | Absent      | Present     | F, p-value       |
|-------------------------|-------------|-------------|------------------|
| Paranoia                | 0.25 (0.24) | 0.49 (0.27) | 9.82, $p < 0.01$ |
| Auditory Hallucinations | 0.35 (0.27) | 0.52 (0.36) | 2.19, $p = 0.15$ |
| Visual Hallucinations   | 0.2 (0.22)  | 0.56 (0.38) | 4.49, $p < 0.05$ |
| Any Psychosis           | 0.31(0.21)  | 0.48(0.28)  | 5.74, $p < 0.03$ |
